# Supplementary material for: Predictors of falls and fractures leading to hospitalisation in 36 101 people with affective disorders: a large representative cohort study
Source: HighWire-hosted journal article supplement (doi:10.1136/bmjopen-2021-055070), 2022-03-01
Supplement: bmjopen-2021-055070supp001_data_supplement.pdf [file bmjopen-2021-055070supp001_data_supplement.pdf]

**Supplementary material Table 1. Mean age at the time of fall/ fracture and mood disorder diagnosis among patients with Mood [affective] disorders**

| Age                              | Presence of falls |                | Presence of fractures |                |
|----------------------------------|-------------------|----------------|-----------------------|----------------|
|                                  | No (n= 34,270)    | Yes (n= 1,831) | No (n= 33,908)        | Yes (n= 2,193) |
| Mean age at diagnosis (SD)       | 43.4 (17.1)       | 62.4 (19.9)    | 43.3 (17.1)           | 60.6 (20.6)    |
| Mean age at fall/ fracture/ (SD) |                   | 64.2 (20.8)    |                       | 62.5 (22.8)    |
